# Supplementary material
Source: PubMed Central journal article supplement (PMC4701212)
Supplement: NIHMS719834-supplement.pdf [file NIHMS719834-supplement.pdf]

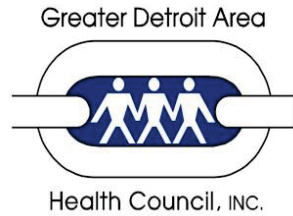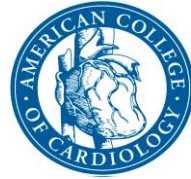

Michigan  
CHAPTER

# Southeast Michigan “See You in 7” Hospital Collaborative: What to Expect

| Focus                                   | Methods/Tools                                                                                                                                                                             | Meetings                                             |
|-----------------------------------------|-------------------------------------------------------------------------------------------------------------------------------------------------------------------------------------------|------------------------------------------------------|
| <u>Pre-Implementation</u><br>May - July | ACC Online Initial Assessment;<br>ACC “See You in 7” Toolkit;<br>Selection of “See You in 7” Process Measures;<br>Analysis of where hospital is, where it should be, and how to get there | Kickoff Meeting;<br>2 Conference Calls/Webinars      |
| <u>Test Intervention</u><br>Aug - Jan   | Plan for Improvement;<br>Pre-Implementation Data Submission;<br>Collaborative hospitals to share best practices, barriers;<br>Quarterly Progress Reports                                  | 2 Quarterly Meetings;<br>4 Conference Calls/Webinars |
| <u>Evaluation</u><br>Feb - April        | Data collected will be evaluated;<br>Lessons learned to be shared;<br>Quarterly Progress Report<br>Post-Implementation Data Submission                                                    | 2 Conference Calls/Webinars;<br>1 Quarterly Meeting  |

## Pre-Implementation Phase: Selecting "See You in 7" Process Measures and Performing Gap Analysis

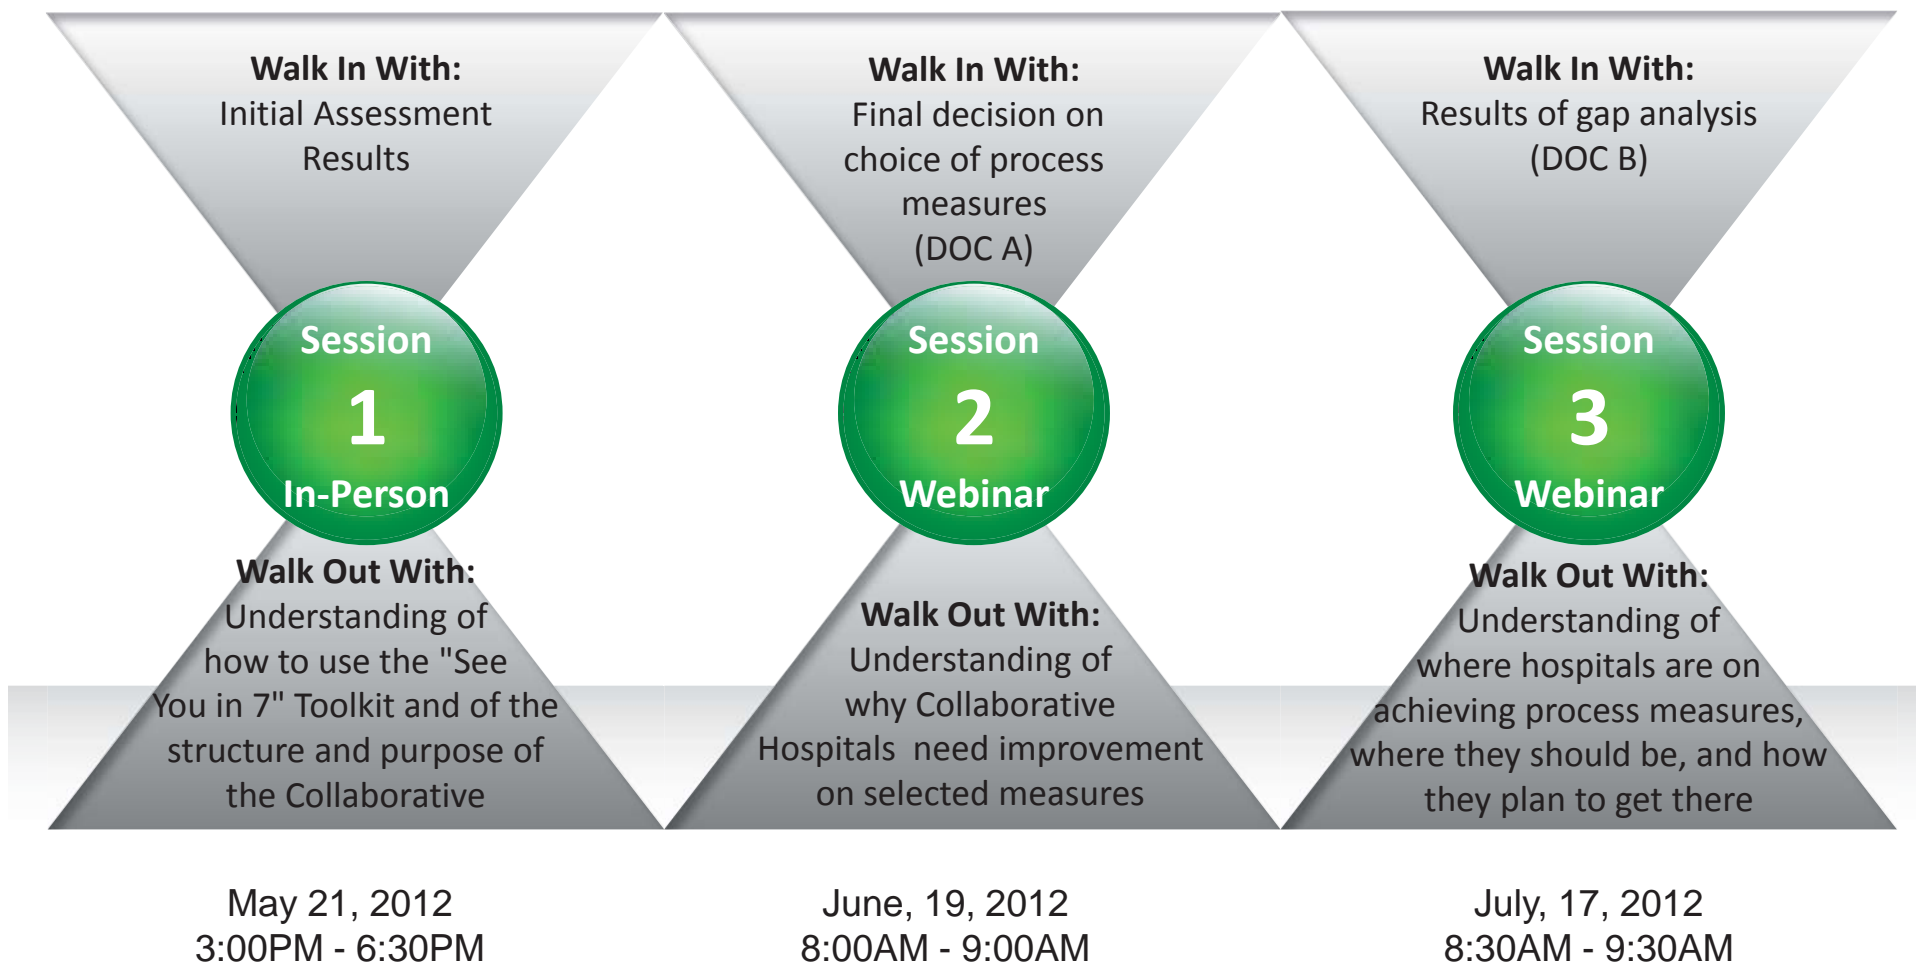

**Due Date: 6/8/2012**

**DOC A**

***Southeast Michigan "See You in 7" Hospital Collaborative: Selected Process Measures***

Please fill out this form and e-mail it to [redacted] Program Manager of Cost Quality, at [redacted] by June 8, 2012. The Process Measure cells have been filled in for your convenience. Please delete the rows containing Process Measures you are not selecting as a focus for the Collaborative.

| Selected Process Measure                                                                                                                     | Why your hospital chose this Process Measure                                                                                                                                                                                                | Barriers to improvement encountered previously                                                                                                           |
|----------------------------------------------------------------------------------------------------------------------------------------------|---------------------------------------------------------------------------------------------------------------------------------------------------------------------------------------------------------------------------------------------|----------------------------------------------------------------------------------------------------------------------------------------------------------|
| Identifying heart failure patients prior to discharge                                                                                        |                                                                                                                                                                                                                                             |                                                                                                                                                          |
| Scheduling and documenting a follow-up visit with a cardiologist or primary care practitioner that takes place within 7 days after discharge | <i>Example: Currently, we tell the patient/family to schedule an appointment when they get home. Appointment should be made before the patient leaves the hospital, and details should be reviewed with the patient prior to discharge.</i> | <i>Example: Previous efforts at making the appt. prior to discharge were difficult, because follow-up appointments were not available within 7 days.</i> |
| Providing the patient with documentation of the scheduled appointment                                                                        |                                                                                                                                                                                                                                             |                                                                                                                                                          |
| Identifying and addressing barriers to keeping the appointment                                                                               |                                                                                                                                                                                                                                             |                                                                                                                                                          |
| Working to ensure that the patient arrives at the appointment within 7 days of discharge                                                     | <i>Example: We aren't currently doing any follow-up and substantial opportunity exists for improvement</i>                                                                                                                                  | <i>Example: N/A</i>                                                                                                                                      |
| Making the discharge summary available to the follow-up health care provider                                                                 |                                                                                                                                                                                                                                             |                                                                                                                                                          |

**Due Date: 7/6/2012**

**DOC B**

## Southeast Michigan "See You in 7" Hospital Collaborative: Gap Analysis

Please fill out this form and e-mail it to [REDACTED] Program Manager of Cost Quality, at [REDACTED] by July 6, 2012. The Process Measure cells have been filled in for your convenience. Please delete the rows containing Process Measures you did not select as a focus for the Collaborative.

| Selected Process Measure                                                                                                                     | Where is your hospital in terms of achieving this process measure?                                                                                                     | Where should your hospital be in terms of achieving this process measure?                                                                                                                                                                    | What interventions will your hospital implement in order to reach these aims? (a more detailed description of interventions to be filled out prior to the second quarterly meeting)                                                  |
|----------------------------------------------------------------------------------------------------------------------------------------------|------------------------------------------------------------------------------------------------------------------------------------------------------------------------|----------------------------------------------------------------------------------------------------------------------------------------------------------------------------------------------------------------------------------------------|--------------------------------------------------------------------------------------------------------------------------------------------------------------------------------------------------------------------------------------|
| Identifying heart failure patients prior to discharge                                                                                        | Nothing right now, only if we catch them in nurse rounding<br>Once diagnosis is entered, there is an alert if core measures aren't met                                 | All HF or potential HF patients are recognized and tracked during the hospitalization to make sure we are implementing interventions                                                                                                         | Review list of cases in core measures to determine if HF team was aware of the patients. Are there trends? Same unit?<br>EMR alerts can be added, PRM can page HF coordinator<br>Identify during rounds                              |
| Scheduling and documenting a follow-up visit with a cardiologist or primary care practitioner that takes place within 7 days after discharge | We tell the patient/family to schedule an appointment when they get home.<br>We don't know if they make the appt, and we don't know if they attend the appt.           | Patients should have an appointment scheduled prior to discharge, this will avoid the dilemma of appt slots not being available.<br>Work with large PCp or HF clinic to arrange for time slot and to recognize importance of seeing patient. | Determine if aiming for : <ul style="list-style-type: none"> <li>• 3 or 7 days</li> <li>• appt with Cardiologist, PCP, or both</li> <li>• who, what, when re: appt</li> <li>• how will we keep track of the patients info</li> </ul> |
| Providing the patient with documentation of the scheduled appointment                                                                        | It is included in the discharge summary                                                                                                                                | The appointment and info about the appt should be more obvious.<br>Patients need to be more aware                                                                                                                                            | Develop special appointment card; info gets lost in large discharge document<br>Call patient to remind them of the appt.                                                                                                             |
| Identifying and addressing barriers to keeping the appointment                                                                               | Really not sure                                                                                                                                                        | Ideally, knowing possible barriers prior to discharge and working at reversing the barriers                                                                                                                                                  | Prior to discharge, when scheduling the appointment, assess and problem solve for barriers (ride, no one to go with pt, competing appts, too tired or sick, etc)                                                                     |
| Working to ensure that the patient arrives at the appointment within 7 days of discharge                                                     | We aren't currently doing any follow-up                                                                                                                                | Measure to determine compliance with appt and identify barriers                                                                                                                                                                              | Audit via f/u phone call to patient to be conducted after the scheduled appt.<br>And/Or<br>Partner with cardiology office to track no show rates and call those patients                                                             |
| Making the discharge summary available to the follow-up health care provider                                                                 | Since going to [REDACTED] discharge summary is poorly organized, physicians may do a lot of cutting and pasting, the discharge summary is not user-friendly for anyone | Clear, concise, priority driven, serve as a handoff, discharge summary should be available prior to the appointment                                                                                                                          | Physician lead team has reorganized summary, retrained staff, created new expectations re: content & format, will audit summaries, and have a hot line for feedback                                                                  |

## Testing Intervention Phase: Implementing Interventions Related to Selected Process Measures

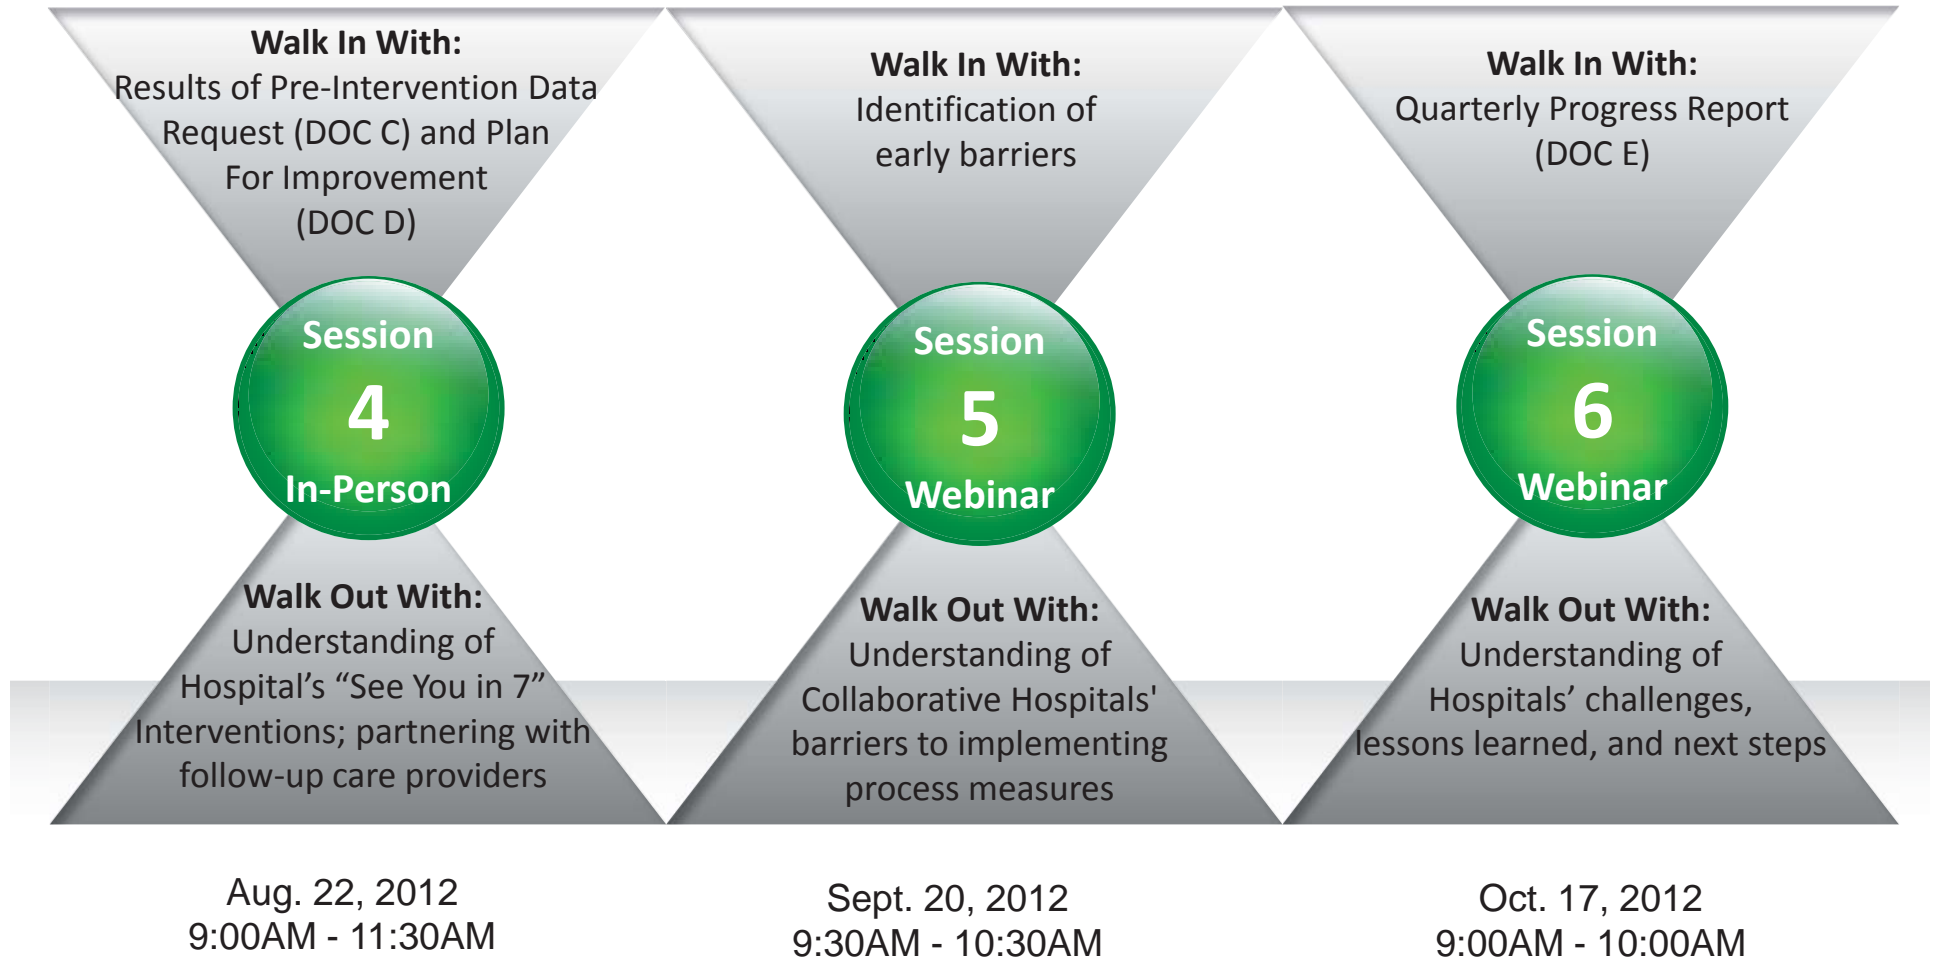

**Due Date: 8/10/2012 and 4/5/2013**

**DOC C**

## **Southeast Michigan "See You in 7" Hospital Collaborative Data Request**

Please complete the data request for the relevant time period and e-mail it to [REDACTED] by **Aug. 10, 2012** for the pre-intervention data and by **April 5, 2013** for the post-intervention data.

|   | <b>Process Measure</b>                                                                                                       | <b>Metric</b>                                                                                                                                                                       | <b>May - July (Pre-Intervention)</b> | <b>Feb. - April (Post-Intervention)</b> |
|---|------------------------------------------------------------------------------------------------------------------------------|-------------------------------------------------------------------------------------------------------------------------------------------------------------------------------------|--------------------------------------|-----------------------------------------|
|   | N/A - Denominator                                                                                                            | # of heart failure patients                                                                                                                                                         | 30                                   | 30                                      |
| 1 | Identify all heart failure patients prior to discharge                                                                       | # of heart failure patients identified prior to discharge                                                                                                                           |                                      |                                         |
| 2 | Scheduling and documenting a follow-up visit with a cardiologist or primary care practitioner that takes place within 7 days | Prior to discharge, # of heart failure patients with a scheduled follow-up visit with a cardiologist or PCP. This visit must be scheduled to take place within 7 days of discharge. |                                      |                                         |
| 3 | Providing patient with documentation of the scheduled appointment                                                            | # of heart failure patients given documentation of the scheduled appointment prior to discharge                                                                                     |                                      |                                         |
| 4 | Identifying and addressing barriers to keeping the appointment                                                               | # of patients with which any potential barriers to keeping the follow-up appointment were identified and addressed prior to discharge                                               |                                      |                                         |
| 5 | Working to ensure that patient arrives at appointment within 7 days of discharge                                             | # of patients who arrived at appointment within 7 days of discharge                                                                                                                 |                                      |                                         |

**Due Date: 8/10/2012**

**“See You in 7” Hospital Collaborative  
Plan for Improvement  
[Enter Hospital Name]**

**DOC D**

| Process Measure #2                                                                                                      | Barriers |
|-------------------------------------------------------------------------------------------------------------------------|----------|
| Schedule and document a follow-up visit with a cardiologist or primary care practitioner that takes place within 7 days |          |

| Strategies                                                                                                                        | Action steps                                                                                                                                                                                                                                                                                                                                           | Target Date               | Responsible Person                                                                            |
|-----------------------------------------------------------------------------------------------------------------------------------|--------------------------------------------------------------------------------------------------------------------------------------------------------------------------------------------------------------------------------------------------------------------------------------------------------------------------------------------------------|---------------------------|-----------------------------------------------------------------------------------------------|
| <i>Example:</i> Identify hospital staff responsible for making follow-up phone calls; provide staff with follow-up script outline | <i>Example:</i> Hold initial meeting with staff responsible for making follow-up phone calls to explain initiative, provide staff with script, and discuss strategies for compiling data on the number of heart failure patients who have a follow-up visit scheduled within 7 days of discharge. Hold meetings monthly to address questions/concerns. | <i>Example:</i> 8/27/2012 | <i>Example:</i> [REDACTED] System Performance Improvement Leader, “See You in 7” Project Lead |
|                                                                                                                                   |                                                                                                                                                                                                                                                                                                                                                        |                           |                                                                                               |
|                                                                                                                                   |                                                                                                                                                                                                                                                                                                                                                        |                           |                                                                                               |
|                                                                                                                                   |                                                                                                                                                                                                                                                                                                                                                        |                           |                                                                                               |

**Due 10/5/2012**

**DOC E**

Please fill out this form and e-mail it to [REDACTED] Program Manager of Cost Quality, at [REDACTED] by *October 5, 2012*.

**“See You in 7” Hospital Collaborative  
Quarterly Progress Report**

**Hospital Name:** \_\_\_\_\_

**Project Leader:** \_\_\_\_\_

**Reporting Period:** Aug. 22 – Oct. 5, 2012

*Instructions: For each process measure your hospital is implementing as part of the “See You in 7” Hospital Collaborative, please fill in the information below.*

Section 1:

***Process Measure #1: Identify all heart failure patients prior to discharge***

**A: Progress** (Describe the strategies undertaken over the last 3 months to achieve this process measure and the dates you implemented these strategies; please include successful and unsuccessful strategies)

| <b>Strategies</b>                                                                                                                                                                                                                                                                                                                                                                                                      | <b>Go Live Date</b>          |
|------------------------------------------------------------------------------------------------------------------------------------------------------------------------------------------------------------------------------------------------------------------------------------------------------------------------------------------------------------------------------------------------------------------------|------------------------------|
| <b>Example:</b> 1 to 2 dedicated staff review patients’ charts daily for any “triggers” and flag the chart (triggers: admission diagnosis codes for HF, shortness of breath, swelling, edema, fluid overload; Secondary diagnosis codes for HF, shortness of breath; history of HF; Abnormal BNP or NT-proBNP levels; treatment with IV diuretics within the last 24 hours; chest X-ray showing HF or pulmonary edema) | <b>Example:</b><br>8/27/2012 |



## Testing Intervention Assessing Progress and Restructuring Interventions Phase

Quarterly Progress Report  
(DOC F)

Session  
7  
In-Person

Session  
8  
Webinar

Session  
9  
Webinar

Nov. 13, 2012  
8:30AM - 11:00AM

Dec. 13, 2012  
8:00AM - 9:00AM

Jan. 17, 2013  
9:30AM - 10:30AM

## Evaluation: Successes and Lessons Learned

Post-Intervention Data  
Request (DOC C)

Quarterly Progress Report  
(DOC G)

Session  
10  
Webinar

Session  
11  
Webinar

Session  
12  
In-Person

Feb. 14, 2012  
9:30AM - 10:30AM

March 14, 2013  
10:00AM - 11:00AM

April 17, 2013  
8:30AM - 11:00AM

Supplementary Table 2

| 30- day Readmission Risk-Standardization Factors (May 1, 2011 through April 30, 2012) |           |       |       |       |           |       |       |       |             |       |       |       |
|---------------------------------------------------------------------------------------|-----------|-------|-------|-------|-----------|-------|-------|-------|-------------|-------|-------|-------|
| Variable                                                                              | CH        |       |       |       | NPH       |       |       |       | Matched NPH |       |       |       |
| Age (years)                                                                           | 76.5±12.3 |       |       |       | 75.6±12.4 |       |       |       | 76.0±12.5   |       |       |       |
|                                                                                       | No        |       | Yes   |       | No        |       | Yes   |       | No          |       | Yes   |       |
|                                                                                       | N         | %     | N     | %     | N         | %     | N     | %     | N           | %     | N     | %     |
| Gender(Male,Female)                                                                   | 15474     | 57.86 | 11270 | 42.14 | 52122     | 55.49 | 41806 | 44.51 | 15399       | 56.93 | 11650 | 43.07 |
| CABG                                                                                  | 26538     | 99.23 | 206   | 0.77  | 93192     | 99.22 | 736   | 0.78  | 26841       | 99.23 | 208   | 0.77  |
| Diabetes                                                                              | 14313     | 53.52 | 12431 | 46.48 | 50183     | 53.43 | 43745 | 46.57 | 14426       | 53.33 | 12623 | 46.67 |
| Disorders of fluid/electrolyte/acid-base                                              | 15355     | 57.41 | 11389 | 42.59 | 56833     | 60.51 | 37095 | 39.49 | 15610       | 57.71 | 11439 | 42.29 |
| Iron deficiency                                                                       | 14051     | 52.54 | 12693 | 47.46 | 53762     | 57.24 | 40166 | 42.76 | 13380       | 49.47 | 13669 | 50.53 |
| Cardio-respiratory failure or shock                                                   | 20623     | 77.11 | 6121  | 22.89 | 74706     | 79.54 | 19222 | 20.46 | 21889       | 80.92 | 5160  | 19.08 |
| Vascular or circulatory disease                                                       | 18705     | 69.94 | 8039  | 30.06 | 65100     | 69.31 | 28828 | 30.69 | 17811       | 65.85 | 9238  | 34.15 |
| COPD                                                                                  | 15064     | 56.33 | 11680 | 43.67 | 54360     | 57.87 | 39568 | 42.13 | 15379       | 56.86 | 11670 | 43.14 |
| Pneumonia                                                                             | 22216     | 83.07 | 4528  | 16.93 | 76507     | 81.45 | 17421 | 18.55 | 22796       | 84.28 | 4253  | 15.72 |
| Renal failure                                                                         | 12416     | 46.43 | 14328 | 53.57 | 44384     | 47.25 | 49544 | 52.75 | 11991       | 44.33 | 15058 | 55.67 |
| Other urinary tract disorders                                                         | 24840     | 92.88 | 1904  | 7.12  | 87873     | 93.55 | 6055  | 6.45  | 25066       | 92.67 | 1983  | 7.33  |
| Decubitus ulcer or chronic skin ulcer                                                 | 24505     | 91.63 | 2239  | 8.37  | 86754     | 92.36 | 7174  | 7.64  | 24783       | 91.62 | 2266  | 8.38  |
| Other gastrointestinal disorders                                                      | 16586     | 62.02 | 10158 | 37.98 | 57603     | 61.33 | 36325 | 38.67 | 15869       | 58.67 | 11180 | 41.33 |
| Acute coronary syndrome                                                               | 24648     | 92.16 | 2096  | 7.84  | 84252     | 89.70 | 9676  | 10.3  | 24058       | 88.94 | 2991  | 11.06 |
| Valvular or rheumatic heart disease                                                   | 21977     | 82.18 | 4767  | 17.82 | 78818     | 83.91 | 15110 | 16.09 | 23114       | 85.45 | 3935  | 14.55 |
| Arrhythmias                                                                           | 13009     | 48.64 | 13735 | 51.36 | 47772     | 50.86 | 46156 | 49.14 | 13518       | 49.98 | 13531 | 50.02 |
| Asthma                                                                                | 25968     | 97.10 | 776   | 2.90  | 90982     | 96.86 | 2946  | 3.14  | 26082       | 96.43 | 967   | 3.57  |
| Peptic ulce                                                                           | 24813     | 92.78 | 1931  | 7.22  | 87287     | 92.93 | 6641  | 7.07  | 24915       | 92.11 | 2134  | 7.89  |
| Cancer                                                                                | 24554     | 91.81 | 2190  | 8.19  | 87022     | 92.65 | 6906  | 7.35  | 24915       | 92.11 | 2134  | 7.89  |
| Substance abuse/psychosis                                                             | 23908     | 89.40 | 2836  | 10.60 | 82447     | 87.78 | 11481 | 12.22 | 23804       | 88.00 | 3245  | 12.00 |
| Major psychiatric disorders                                                           | 25507     | 95.37 | 1237  | 4.63  | 89967     | 95.78 | 3961  | 4.22  | 25901       | 95.76 | 1148  | 4.24  |
| ESRD_dialysis                                                                         | 24975     | 93.39 | 1769  | 6.61  | 88487     | 94.21 | 5441  | 5.79  | 25291       | 93.50 | 1758  | 6.50  |
| Hematological                                                                         | 26174     | 97.87 | 570   | 2.13  | 92455     | 98.43 | 1473  | 1.57  | 26549       | 98.15 | 500   | 1.85  |
| Nephritis                                                                             | 26123     | 97.68 | 621   | 2.32  | 91187     | 97.08 | 2741  | 2.92  | 26181       | 96.79 | 868   | 3.21  |
| Liver or biliary disease                                                              | 25619     | 95.79 | 1125  | 4.21  | 89659     | 95.46 | 4269  | 4.54  | 25835       | 95.51 | 1214  | 4.49  |
| Metastatic cancer or acute leukemia                                                   | 26145     | 97.76 | 599   | 2.24  | 92201     | 98.16 | 1727  | 1.84  | 26492       | 97.94 | 557   | 2.06  |
| Stroke                                                                                | 26191     | 97.93 | 553   | 2.07  | 91767     | 97.70 | 2161  | 2.3   | 26457       | 97.81 | 592   | 2.19  |
| Dementia                                                                              | 23485     | 87.81 | 3259  | 12.19 | 83608     | 89.01 | 10320 | 10.99 | 23780       | 87.91 | 3269  | 12.09 |
| Coronary atherosclerosis or angina                                                    | 10290     | 38.48 | 16454 | 61.52 | 37810     | 40.25 | 56118 | 59.75 | 10008       | 37.00 | 17041 | 63.00 |
| Other or unspecified heart disease                                                    | 26043     | 97.38 | 701   | 2.62  | 90790     | 96.66 | 3138  | 3.34  | 26180       | 96.79 | 869   | 3.21  |

|                                             |       |       |      |       |       |       |       |       |       |       |      |       |
|---------------------------------------------|-------|-------|------|-------|-------|-------|-------|-------|-------|-------|------|-------|
| Other psychiatric disorders                 | 23797 | 88.98 | 2947 | 11.02 | 86388 | 91.97 | 7540  | 8.03  | 24706 | 91.34 | 2343 | 8.66  |
| Hemiplegia/paraplegia/functional disability | 24687 | 92.31 | 2057 | 7.69  | 87255 | 92.90 | 6673  | 7.1   | 24953 | 92.25 | 2096 | 7.75  |
| Fibrosis of lung                            | 26043 | 97.38 | 701  | 2.62  | 90746 | 96.61 | 3182  | 3.39  | 26077 | 96.41 | 972  | 3.59  |
| Protein-calorie malnutrition                | 24350 | 91.05 | 2394 | 8.95  | 87164 | 92.80 | 6764  | 7.2   | 24766 | 91.56 | 2283 | 8.44  |
| Depression                                  | 23158 | 86.59 | 3586 | 13.41 | 80433 | 85.63 | 13495 | 14.37 | 23495 | 86.86 | 3554 | 13.14 |

Supplementary Table 2b

| 30- day Readmission Risk-Standardization Factors (May 1, 2012 through April 30, 2013) |           |       |       |       |           |       |       |       |             |       |       |       |
|---------------------------------------------------------------------------------------|-----------|-------|-------|-------|-----------|-------|-------|-------|-------------|-------|-------|-------|
| Variable                                                                              | CH        |       |       |       | NPH       |       |       |       | Matched NPH |       |       |       |
| Age (years)                                                                           | 76.4±12.2 |       |       |       | 75.5±12.4 |       |       |       | 76.1±12.4   |       |       |       |
|                                                                                       | No        |       | Yes   |       | No        |       | Yes   |       | No          |       | Yes   |       |
|                                                                                       | N         | %     | N     | %     | N         | %     | N     | %     | N           | %     | N     | %     |
| Gender(Male,Female)                                                                   | 14145     | 56.92 | 10704 | 43.08 | 50854     | 55.08 | 41467 | 44.92 | 14557       | 56.62 | 11152 | 43.38 |
| CABG                                                                                  | 24654     | 99.22 | 195   | 0.78  | 91588     | 99.21 | 733   | 0.79  | 25528       | 99.30 | 181   | 0.70  |
| Diabetes                                                                              | 13106     | 52.74 | 11743 | 47.26 | 49231     | 53.33 | 43090 | 46.67 | 13761       | 53.53 | 11948 | 46.47 |
| Disorders of fluid/electrolyte/acid-base                                              | 13696     | 55.12 | 11153 | 44.88 | 55016     | 59.59 | 37305 | 40.41 | 14899       | 57.95 | 10810 | 42.05 |
| Iron deficiency                                                                       | 12825     | 51.61 | 12024 | 48.39 | 52007     | 56.33 | 40314 | 43.67 | 13008       | 50.60 | 12701 | 49.40 |
| Cardio-respiratory failure or shock                                                   | 18198     | 73.23 | 6651  | 26.77 | 71222     | 77.15 | 21099 | 22.85 | 20518       | 79.81 | 5191  | 20.19 |
| Vascular or circulatory disease                                                       | 17343     | 69.79 | 7506  | 30.21 | 63489     | 68.77 | 28832 | 31.23 | 17316       | 67.35 | 8393  | 32.65 |
| COPD                                                                                  | 14026     | 56.44 | 10823 | 43.56 | 53279     | 57.71 | 39042 | 42.29 | 14747       | 57.36 | 10962 | 42.64 |
| Pneumonia                                                                             | 20603     | 82.91 | 4246  | 17.09 | 74480     | 80.68 | 17841 | 19.32 | 21448       | 83.43 | 4261  | 16.57 |
| Renal failure                                                                         | 11138     | 44.82 | 13711 | 55.18 | 42496     | 46.03 | 49825 | 53.97 | 11481       | 44.66 | 14228 | 55.34 |
| Other urinary tract disorders                                                         | 23069     | 92.84 | 1780  | 7.16  | 86647     | 93.85 | 5674  | 6.15  | 23979       | 93.27 | 1730  | 6.73  |
| Decubitus ulcer or chronic skin ulcer                                                 | 22689     | 91.31 | 2160  | 8.69  | 85203     | 92.29 | 7118  | 7.71  | 23576       | 91.70 | 2133  | 8.30  |
| Other gastrointestinal disorders                                                      | 14936     | 60.11 | 9913  | 39.89 | 55307     | 59.91 | 37014 | 40.09 | 15167       | 58.99 | 10542 | 41.01 |
| Acute coronary syndrome                                                               | 22761     | 91.60 | 2088  | 8.40  | 82757     | 89.64 | 9564  | 10.36 | 22857       | 88.91 | 2852  | 11.09 |
| Valvular or rheumatic heart disease                                                   | 20309     | 81.73 | 4540  | 18.27 | 76784     | 83.17 | 15537 | 16.83 | 21907       | 85.21 | 3802  | 14.79 |
| Arrhythmias                                                                           | 11636     | 46.83 | 13213 | 53.17 | 45892     | 49.71 | 46429 | 50.29 | 12692       | 49.37 | 13017 | 50.63 |
| Asthma                                                                                | 24201     | 97.39 | 648   | 2.61  | 89172     | 96.59 | 3149  | 3.41  | 24738       | 96.22 | 971   | 3.78  |
| Peptic ulcer                                                                          | 22911     | 92.20 | 1938  | 7.80  | 85579     | 92.70 | 6742  | 7.3   | 23737       | 92.33 | 1972  | 7.67  |
| Cancer                                                                                | 22896     | 92.14 | 1953  | 7.86  | 85383     | 92.48 | 6938  | 7.52  | 23640       | 91.95 | 2069  | 8.05  |
| Substance abuse/psychosis                                                             | 21866     | 88.00 | 2983  | 12.00 | 80441     | 87.13 | 11880 | 12.87 | 22681       | 88.22 | 3028  | 11.78 |
| Major psychiatric disorders                                                           | 23675     | 95.28 | 1174  | 4.72  | 88432     | 95.79 | 3889  | 4.21  | 24683       | 96.01 | 1026  | 3.99  |
| ESRD_dialysis                                                                         | 23080     | 92.88 | 1769  | 7.12  | 86894     | 94.12 | 5427  | 5.88  | 24191       | 94.10 | 1518  | 5.90  |
| Hematological                                                                         | 24483     | 98.53 | 366   | 1.47  | 91384     | 98.99 | 937   | 1.01  | 25411       | 98.84 | 298   | 1.16  |

|                                                 |       |       |       |       |       |       |       |       |       |       |       |       |
|-------------------------------------------------|-------|-------|-------|-------|-------|-------|-------|-------|-------|-------|-------|-------|
| <b>Nephritis</b>                                | 24272 | 97.68 | 577   | 2.32  | 89488 | 96.93 | 2833  | 3.07  | 24908 | 96.88 | 801   | 3.12  |
| <b>Liver or biliary disease</b>                 | 23723 | 95.47 | 1126  | 4.53  | 87960 | 95.28 | 4361  | 4.72  | 24563 | 95.54 | 1146  | 4.46  |
| <b>Metastatic cancer or acute leukemia</b>      | 24337 | 97.94 | 512   | 2.06  | 90545 | 98.08 | 1776  | 1.92  | 25195 | 98.00 | 514   | 2.00  |
| <b>Stroke</b>                                   | 24289 | 97.75 | 560   | 2.25  | 90152 | 97.65 | 2169  | 2.35  | 25128 | 97.74 | 581   | 2.26  |
| <b>Dementia</b>                                 | 23119 | 93.04 | 1730  | 6.96  | 85632 | 92.75 | 6689  | 7.25  | 23964 | 93.21 | 1745  | 6.79  |
| <b>Coronary atherosclerosis or angina</b>       | 9547  | 38.42 | 15302 | 61.58 | 37325 | 40.43 | 54996 | 59.57 | 9861  | 38.36 | 15848 | 61.64 |
| <b>Other or unspecified heart disease</b>       | 24057 | 96.81 | 792   | 3.19  | 89248 | 96.67 | 3073  | 3.33  | 24943 | 97.02 | 766   | 2.98  |
| <b>Other psychiatric disorders</b>              | 21729 | 87.44 | 3120  | 12.56 | 82525 | 89.39 | 9796  | 10.61 | 23142 | 90.02 | 2567  | 9.98  |
| <b>Hemiplegia/paraplegia/functional disabil</b> | 22769 | 91.63 | 2080  | 8.37  | 85381 | 92.48 | 6940  | 7.52  | 23704 | 92.20 | 2005  | 7.80  |
| <b>Fibrosis of lung</b>                         | 24147 | 97.17 | 702   | 2.83  | 89181 | 96.60 | 3140  | 3.4   | 24873 | 96.75 | 836   | 3.25  |
| <b>Protein-calorie malnutrition</b>             | 22358 | 89.98 | 2491  | 10.02 | 85654 | 92.78 | 6667  | 7.22  | 23582 | 91.73 | 2127  | 8.27  |
| <b>Depression</b>                               | 21480 | 86.44 | 3369  | 13.56 | 78747 | 85.30 | 13574 | 14.7  | 22343 | 86.91 | 3366  | 13.09 |
